# Supplementary material
Source: PubMed Central journal article supplement (PMC503735)
Supplement: pnas_101_30_11013__4.pdf [file pnas_101_30_11013__4.pdf]

Spinach 1 MAATTTTMMGMATTFVFKPQAPPMAALPSNTGRSLFGLKT-GSRGGR-MTMAAYKVTLEVTPTGN--VEFCPPDDVYILDAAEAEAGIDLPSYCRAGSCSS 96  
 SynWH8102\_1 1 -----MASYKVTLE---GG--SIFECDDVYILDAAEAEAGIDLPSYCRAGACST 44  
 SynPCC7002 1 -----MATYKVTLLTPDGE--VSYDAPDDEYILDAAGDAGYDLPAASCRAGACST 47  
 SynPCC6803\_1 1 -----MASYKVTLLTPDGE--SIFECDDVYILDAAEAEAGIDLPSYCRAGACST 47  
 Arabidopsis 1 MASTALSSAIVSTSFLLRQQTPISLRSLPANTQSLFGLKSSSTARGGVMTAMATYKVKHETPEGE--QEVCEDEYVYILDAAEAEAGIDLPSYCRAGSCSS 98  
 Chlamydomonas 1 -----MAMAMRSTFAARVGAKEPAVRGAPASRMSCMAYKVTLEKTPSG--DKTIECPADTYILDAAEAEAGIDLPSYCRAGACSS 76  
 AnaPCC7120\_1 1 -----MASYKVTLLNKKODITTEIIEEETITLDGAENGIELPFSCHSKSCSS 49  
 AnaPCC7120\_2 1 -----MATYKVTLLNEAEGTKHEIEVDPDEYILDAAEAEAGIDLPSYCRAGACST 49  
 ProSS120\_1 1 -----MASYKVTLVSESEGLNQTIEVPDDQYILDAAEAEAGIDLPSYCRAGACST 49  
 ProMED4\_1 1 -----MASYKVTLLVSESEGLNSTIEVPDDQYILDAAEAEAGIDLPSYCRAGACST 49  
 SynWH8102\_2 1 -----MASYKVTLVSESEGLNKTIEVPDDQYILDAAEAEAGIDLPSYCRAGACST 49  
 ProMIT9313\_1 1 -----MASYKVTLLVSESEGLNKTIEVPDDQYILDAAEAEAGIDLPSYCRAGACST 49  
 Cyanothece 1 -----MATYKVTLLNECEGINATIDVPEDEYILDAAEAEAGIDLPSYCRAGACST 49  
 Cyanophora 1 -----MAVYKVTLLICEEQGLDITTECPDDEYILDAAEAEAGIDLPSYCRAGACST 49  
 Syn elongatus 1 -----MATYKVTLLVRPDGS--ETITDVPDEYILDAAEAEAGIDLPSYCRAGACST 48  
 P-SSM2 1 -----MAYSTITRSPDGA--EEVVOCEDEYILDAAEAEAGIDLPSYCRAGACSA 47  
 SynPCC6803\_2 1 -----MGLIYSWNLVNPATGSDVTEVAEDELILEAAENQGLDLPYCRAGACSA 50  
 SynWH8102\_3 1 -----MGTSHRITLHWRQEQRTITLHDVPEGEYILDAAEAEAGIDLPSYCRAGACST 50  
 ProMIT9313\_2 1 -----MTSLHKITLHHRQAGRTITFDVDPGEYILDAAEAEAGIDLPSYCRAGACST 50  
 ProSS120\_2 1 -----MHSKRTIVRLRDNRIISKETPEGSEILRKEEEDGVLFPSCRNGCCCT 49  
 ProMED4\_2 1 -----MKKTKVITITNKETGKIYQENISDQYILKEPEKKGIRLPFSCRNGCCCT 50  
 SynPCC6803\_3 1 -----MSRSHRVLHHRQNEKDYSVIYDRIYHQADQGFELPFSCRNGACSA 50  
 AnaPCC7120\_3 1 -----MSEHTVYKVRDRATGQYTLKVPEDRYILDAAEAEAGIDLPSYCRAGACT 50  
 SynWH8102\_4 1 -----MSEVATYTVRAEPEGTHSFSRADQTVLNAABAAGVTLFPSSCCSGVCTT 50  
 ProMED4\_3 1 -----MSEYNIKVLEKKTYVFLCPEDQITLSAAKANGIDLPSYCRAGACSA 47  
 SynPCC6803\_4 1 -----MVNTYTAIEIQHGGQTYTISVPEDKTVLGAADDEGICLFTSCGAGVCTT 48  
 AnaPCC7120\_4 1 -----MSKTYTVEILHQKTHLQVPEKDTILSVADEQGLDLPSSCHAGVCTT 48  
 Clustal Consen 1 :: \* : \* \* : \* : 9

Spinach 97 CAGKLTGSLNDDQ--SFLDDDDQIDEGVLTCAAYPVSQVITIEH--KEEELTA----- 147  
 SynWH8102\_1 45 CAGKVLSGSVDQDDQ--SFLDDDDQIGGGFALLCVSYPTSDCSIKAN--AEDDL----- 93  
 SynPCC7002 48 CAGKIYSGTVDQSEEQ--SFLDDDDQIEAGVVLTCVAYPTSDVTIETH--KEEELY----- 97  
 SynPCC6803\_1 48 CAGKITAGSVDQSDQ--SFLDDDDQIEAGVVLTCVAYPTSDCTIETH--KEEELY----- 97  
 Arabidopsis 99 CAGKVVSGSIDQSDQ--SFLDDDDQMSSEGVVLTCAVYPTSDVVIETH--KEEAIM----- 148  
 Chlamydomonas 77 CAGKVAAGTVDQSDQ--SFLDDDDQMGNGFVLTCAVYPTSDCTIOTH--QEEELY----- 126  
 AnaPCC7120\_1 50 CAGKVVSGSVDQSDQ--SFLDDDDQMGKGFALLCVTYPRSNCTIKTH--QEPYLA----- 99  
 AnaPCC7120\_2 50 CAGKLVSGTVDQSDQ--SFLDDDDQIEAGVVLTCVAYPTSDVVIOTH--KEEELY----- 99  
 ProSS120\_1 50 CAGKITSGSVDQSDQ--SFLDDDDQIEAGFVLTCAVYPTSDVTITTH--AEEELY----- 99  
 ProMED4\_1 50 CAGKITSGTVDQSDQ--SFLDDDDQIEAGFVLTCAVYPTSDVTITTH--AEEELY----- 99  
 SynWH8102\_2 50 CAGKITAGTVDQSDQ--SFLDDDDQIEAGFVLTCAVYPTSDCTIKTH--AEEELY----- 99  
 ProMIT9313\_1 50 CAGKLTGGSVDQSDQ--SFLDDDDQIEAGFVLTCAVYPTSDCTIKTH--AEEELY----- 99  
 Cyanothece 50 CAGKLVGTVDQSDQ--SFLDDDDQVAGFVLTCAVYPTSDCTIETH--QEEELY----- 99  
 Cyanophora 50 CAGKVVSGTVDQSDQ--SFLDDDDQVLAAGVLTCAVYPTSDCTIKTH--QEEELY----- 99  
 Syn elongatus 49 CAGKLVGEGVDQSDQ--SFLDDDDQIEKGFVLTCAVYPTSDCTIKTN--QEEELY----- 98  
 P-SSM2 48 CAGKLVGEGVNNDEEQ--SFLDDDDQIEKGFVLTCAVYPTSDCTIKTE--QEDNLD----- 97  
 SynPCC6803\_2 51 CAGRLLEGTVHEHDKGSDFLKPEELAAAGVLLCAAYATSDCKILTH--QEEALFG----- 103  
 SynWH8102\_3 51 CAVRVKQGQLDQREA--MGLSHELRQCGYLLCVARAIGFLEAETQ--DEDEVYDLOFGRHFRGKVTAGLPLDEE-- 122  
 ProMIT9313\_2 51 CAVRIISGEMDQTAG--IGLSKEMRDKGYGLLCAVARATSELEVETQ--DEDEVYEMQFGKDLGSIKSKAGSPFDL-- 121  
 ProSS120\_2 50 CAVRIISGTHDQHDG--IGLSKOMQENGYGLLCAKAVITGFADLETQ--DEDEVYELQFGRYLGSIKNRTPGNPFDM-- 120  
 ProMED4\_2 51 CAVKILSGKLDQPEA--MGLVSDLLKDKGYALLCVAVIETIEVETT--YYDEVYDLOFGYFGKGRKTRKAPWFEED 124  
 SynPCC6803\_3 51 CAVRVVSGQIHOPEA--MGLSPDLRQGYALLCVVYQSDLEVETQ--DEDEVYELQFGRYFAGRVRGLPLDED-- 122  
 AnaPCC7120\_3 51 CAVRVVSGDIYOPEA--VGLSLELRQGYALLCVVYARSLEVETQ--DEDEVYELQFGRYFAKGRVKAGLPLDEE-- 122  
 SynWH8102\_4 51 CAAVITSDGVEQEDA--MGLVKELOQQGYALLCVAVPRADLTAKAG--QEDALYEAQFGQYQK----- 109  
 ProMED4\_3 48 CASMVLDSVQEDA--MGLNDDLKQKGFALLCVAVYKSDLHETIIGDEVEDNLYNNOFGKYQI----- 108  
 SynPCC6803\_4 49 CAALITEGTAEADG--MGLVSAELQAGGYALLCVAVYPRDLKITE--REDEVYQROFGQGG----- 106  
 AnaPCC7120\_4 49 CAGQIITGTVDQSDG--MGLVSPLELQQGYALLCVAVYPRDLKITE--REDEVYQROFGK----- 104  
 Clustal Consen 10 \* : \* : : \* \* \* : : : 19
