# Supplementary material
Source: PubMed Central journal article supplement (PMC503735)
Supplement: pnas_101_30_11013__5.pdf [file pnas_101_30_11013__5.pdf]

ProMIT9313\_02 1 -----MRIYCHQDQQAISMLCYIDEILESMDKQPRFGFVNFABTWNGLRAMGVTIGLSTELLTGQISLISQMLG----- 73  
SynWH8102\_06 1 -----MSDNARFGFVNFABTWNGLRAMGVTIGLSTELLTGQISLISQMLG----- 46  
ProMED4\_01 1 -----MNEEDNQPRFGFVNFABTWNGLRAMGVTIGLSTELLTGQISLISQMLG----- 48  
ProSS120\_04 1 -----MSPEDIEPRYGFVNFABTWNGLRAMGVTIGLSTELLTGQISLISQMLG----- 49  
SynWH8102\_01 1 -----MSDSASKTRDDWYQDAARAISSEFRNRAELNGLRAMGLTIGLSTELLTGQISLISQMLG----- 67  
SynWH8102\_05 1 -----MAGPHARRALGAETVRKSNPYQLKRGNGRSRVTVLRSIEIPMANSNDNWQFQTAARHILEQLKQAEFRNGRAAMLGVTIGLSTELLTGQISLISQMLG----- 118  
Guillardia 1 MINIVLHNFNKIGKNIYGVKNLKTQYSTITDFISDDNNIPKIVLSEKIEISNREKLLKILAEKWKVLEKLEILNKIKFCSKYVSEFINCRFAMEFITTTCLLTELTKGSLISQMLGMLRVLGIIN----- 127  
ProMED4\_13 1 -----MKEEKPPLKNSDNPSTENLKEETNTNTSSDNEYSKWVDNQGDEVKDFGFGNSAELVNGRAAMIGFLMLLTELTKGSLISQMLG----- 88  
ProSS120\_06 1 -----MRMEDNLNQKNEEDRFDENLIGSRKEITGTSDAKWVDNDNEVTQVFGFENNAELVNGRAAMIGFLMLLTELTKGSLISQMLG----- 88  
ProSS120\_03 1 -----MFCNLKKAELVNGRLAMIGVTIGLSTELLTGQISLISQMLG----- 30  
P-SSM2\_06 1 -----MNQNPFTGNDSSIRTIRSMIDYSHQVWRMAERWNGRLAMIGVTIGLSTELLTGQISLISQMLG----- 52  
ProMED4\_20 1 -----MKKESKINKLTKKVVQKQELNLWKKGFTECAFVNGRMAIGLIGLITLIVIALISKFFSI----- 60  
ProSS120\_09 1 -----MNSQSTNKKKESTOSVEKSELNAWKHGFTECAFVNGRMAIGLIGLITLIVIALISKFFSI----- 60  
ProMIT9313\_01 1 -----MASEPLDNTSAPFVSEELNAWRHGFTECAFVNGRMAIGLIGLITLIVIALISKFFSI----- 67  
SynWH8102\_08 1 -----MAEQLEKTTGGVAFVGSDELNAWKHGFTECAFVNGRMAIGLIGLITLIVIALISKFFSI----- 59  
AnabPCC7120\_05 1 -----METRSTDLPKVATEYNGVDRNAFLFGVNPQSEHVNGLRAMIGFLAYLLWDLGYSVLRDVLHLIGY----- 67  
AnabPCC7120\_06 1 -----MQTRPSTDLPPVAPAYNGVDRNAFLFGVNPQSEHVNGLRAMIGFLAYLLWDLGYSVLRDVLHLIRY----- 67  
AnabPCC7120\_01 1 -----MELYPTDKTETAYNGKDRNAFLFGVNPQSEHVNGLRAMIGFLAYLLWDLGYSVLRDVLHLVAYNAG----- 67  
AnabPCC7120\_04 1 -----MTDTTKISASVVEDRNSWRWGFTECAFVNGRMAIGLIGLITLIVIALISKFFSI----- 59  
AnabPCC7120\_08 1 -----MGNHOSSEVNGRLAMIGFLAAITAEFFSGOGLHFWHIL----- 40  
AnabPCC7120\_07 1 -----MSGFKNPKSTVTSEFNVAFLFGTSESESNWGRFAMIGFLITLIVIALISKFFSI----- 59  
SyncyPCC6803\_C 1 -----MNNENSKFCPTAHANWNGRLAMIGFSSAITLIVIALISKFFSI----- 47  
Cyanophora 1 -----MQEERNIWNWGFTECAFVNGRMAIGFLAALLTESLIGLITLIVIALISKFFSI----- 49  
Arabidopsis 1 -----MSSSPLSSSLFHLPLSTLSTHCHGRQNLFCNRKQOPFVVRRAAKLPEGVIVRAQPKSPQAPLIGTQTAHWNRAACVIGLITLIVIALISKFFSI----- 110  
Porphyra 1 -----MKKNFVWFVGFDSAEVNGRMAIGFMAVITLIVIALISKFFSI----- 48  
ProSS120\_05 1 -----MTSNNPSELKSVSSKSESQENNDENTDVMQTFPATTPIPSFCNSGMAERVNGRMAIGFIALVITLIVIALISKFFSI----- 82  
SynWH8102\_02 1 -----MTSPSEPPATASVPETSAATSDVPAFCNSGMAERVNGRMAIGFIALVITLIVIALISKFFSI----- 66  
ProMIT9313\_04 1 -----MTSPKQNLPGDQLPSEQVAFEGSSEVQPPINSATTGDPPTFCNSGMAERVNGRMAIGFIALVITLIVIALISKFFSI----- 77  
ProMED4\_02 1 -----MTSNQEQNNQEMALEKTNSEBIKIEQSIIEIDRYEFGNSNYSPITNCRAMGLFALITLIVIALISKFFSI----- 88  
SyncyPCC6803\_D 1 -----MSEELQFNQTPVQEDPKFCENNYAELNCRAMGLFALITLIVIALISKFFSI----- 57  
AnabPCC7120\_03 1 -----MSQTPQVTPKLEBPKFGENYAEERLNGRAAMIGFLIMVIEYATNOCGLSLWELHK----- 56  
ProMIT9313\_03 1 -----MLEPTIIPQRKPRYCFHSHNKEKLNCRAMGLFIALVITLIVIALISKFFSI----- 50  
SynWH8102\_03 1 -----MLEPTIIPQRKPRYCFHSHNKEKLNCRAMGLFIALVITLIVIALISKFFSI----- 50  
ProSS120\_02 1 -----MIDPKIIPERKLPSPGHNHTENLNGRMAIGFIALVITLIVIALISKFFSI----- 50  
ProMED4\_03 1 -----MIKPDIVPKRKLPRYCFHFNKLNCRAMGLFIALVITLIVIALISKFFSI----- 50  
SynWH8102\_04 1 -----MAQTPSTDAPIRGATVITEDGRLNAFASERMOVVEAEOGWFHEBAEKLNGRMAIGFIALVITLIVIALISKFFSI----- 84  
SynPCC7942\_A 1 -----MRSGRVDFEFCRQNFATIEQVVAEADASNCEHEDRAEKLNGRMAIGFIALVITLIVIALISKFFSI----- 72  
SyncyPCC6803\_A 1 -----MTTRGFLDQDNRNLNFAIEPEVYVDSS-VQAGWTKYAEKNGRMAIGFASLITLIVIALISKFFSI----- 70  
SyncyPCC6803\_B 1 -----MTRGFLDQDNRNLNFAIEPEVYVDSS-VQAGWTKYAEKNGRMAIGFASLITLIVIALISKFFSI----- 70  
AnabPCC7120\_02 1 -----MRTNNAIVDDQGLMNFATIEPKVYVDEQDRTGTFYVAELVNGRMAIGFIALVITLIVIALISKFFSI----- 72  
ProMED4\_04 1 -----MTPBAERNGMAAMLGFVAAGVAVTTGQIIPGVF----- 35  
P-SSP7\_01 1 -----MKTLDLTLLENYAYEPIQLLPPKRLMSBBAERNGMAAMLGFVAAGVAVTTGQIIPGVF----- 63  
ProMED4\_12 1 -----MTPBAERNGMAAMLGFVAAGVAVTTGQIIPGVF----- 35  
ProMED4\_06 1 -----MTPBAERNGMAAMLGFVAAGVAVTTGQIIPGVF----- 35  
ProMED4\_16 1 -----MTPBAERNGMAAMLGFVAAGVAVTTGQIIPGVF----- 35  
ProSS120\_08 1 -----MTPBAERNGMAAMLGFVAAGVAVTTGQIIPGVF----- 35  
ProSS120\_11 1 -----MTPBAERNGMAAMLGFVAAGVAVTTGQIIPGVF----- 35  
P-SSM2\_03 1 -----MTPBAERNGMAAMLGFVAAGVAVTTGQIIPGVF----- 35  
P-SSM4\_01 1 -----MTPBAERNGMAAMLGFVAAGVAVTTGQIIPGVF----- 35  
ProSS120\_12 1 -----MTPBAERNGMAAMLGFVAAGVAVTTGQIIPGVF----- 35  
ProMED4\_08 1 -----MSPLAVFLILVSLTALLVASLTKQFQENLIYSNKNQMTNSNTKTKTIEKEKVVAEVNLNGRMAIGFIAAGVAVTTGQIIPGVF----- 86  
ProMED4\_18 1 -----MSPLAVFLILVSLTALLVASLTKQFQENLIYSNKNQMTNSNTKTKTIEKEKVVAEVNLNGRMAIGFIAAGVAVTTGQIIPGVF----- 86  
ProMED4\_21 1 -----MAKIKSVEKEKIVAEKLNCRMAIGFIAAGVAVTTGQIIPGVF----- 44  
ProMED4\_05 1 -----MNSKRVKVLTKTVEKEKVVAEKLNCRMAIGFIAAGVAVTTGQIIPGVF----- 51  
P-SSM4\_03 1 -----MTTPKPIEKEKIVAEKLNCRMAIGFIAAGVAVTTGQIIPGVF----- 44  
ProMED4\_11 1 -----MKNNEPKLVEKEKIVAEKLNCRMAIGFIAAGVAVTTGQIIPGVF----- 46  
ProMIT9313\_08 1 -----MKKTPTNVRVENKQLTAERVNGRMAIGFIAAGVAVTTGQIIPGVF----- 47  
ProMED4\_10 1 -----MEFVKKFVTEKAEKNGRMAIGFIAAGVAVTTGQIIPGVF----- 42  
ProMED4\_07 1 -----MSNSSYTTESGGRONMFPSETRPYIDESVSYDQYFQNAEKVNGRMAIGFVALLGAVVTTGQIIPGVF----- 69  
ProMED4\_17 1 -----MSNSSYTTESGGRONMFPSETRPYIDESVSYDQYFQNAEKVNGRMAIGFVALLGAVVTTGQIIPGVF----- 68  
ProMED4\_14 1 -----MANSQVTTESGGRONMFPSETRPYIDESVSYDQYFQNAEKVNGRMAIGFVALLGAVVTTGQIIPGVF----- 69  
ProSS120\_07 1 -----MTSSAQAIITTESGRONMFPVBAQPOLVEN--YSGLIEDAKRNGRMAIGFIALGAVLTTGQIIPGVF----- 69  
P-SSM2\_01 1 -----MTSSSTTEKYVTEYKQNMFGAEVTPWVDENDNYEGYALNAEKVNGRMAIGFIALGAVLTTGQIIPGVF----- 72  
ProMIT9313\_09 1 -----MNEENAEVNGRMAIGFIALGAVLTTGQIIPGVF----- 35  
ProMIT9313\_06 1 -----MTSSTNVITEDGGRONMYASEER--MOIDPEYTAESKEAELNCRMAIGFIAAGVAVTTGQIIPGVF----- 67  
P-SSM4\_04 1 -----KTDLIEDVATQAEVNGRMAIGFIAAGVAVTTGQIIPGVF----- 68  
ProSS120\_10 1 -----MKTSTSTKVTESKVLAEKLNCRMAIGFIAAGVAVTTGQIIPGVF----- 47  
P-SSM2\_05 1 -----MTKQTKTEDKVDVFAEAKWNGRMAIGFIAAGVAVTTGQIIPGVF----- 47  
P-SSM4\_02 1 -----MDEKAEKLNCRMAIGFIAAGVAVTTGQIIPGVF----- 36  
ProMIT9313\_05 1 -----MPSDFLKEITINDCMFNKAEVNLNGRMAIGFIALGAVLTTGQIIPGVF----- 48  
ProMIT9313\_07 1 -----MTIADFMSNKAETVNGRMAIGFIALGAVLTTGQIIPGVF----- 41  
ProSS120\_13 1 -----MDQANVSLVDIAHGRFAMIGFIALGAVLTTGQIIPGVF----- 39  
P-SSM2\_04 1 -----MNNKQIFLRANGRAAMIGFIALGAVLTTGQIIPGVF----- 37  
ProMED4\_09 1 -----MNSKPNYQNAERTNCRMAIGFIALGAVLTTGQIIPGVF----- 42  
ProMED4\_19 1 -----MNSKPNYQNAERTNCRMAIGFIALGAVLTTGQIIPGVF----- 42  
ProMED4\_22 1 -----MSPLTGFTIVVIAITLQFTLYTIKRLQEPDLPNLFDSQKSPKMNRRKKSFKWNAELVNGRMAIGFIALGAVLTTGQIIPGVF----- 84  
P-SSM2\_02 1 -----MNYWKNAEVNGRMAIGFIAAGVAVTTGQIIPGVF----- 37  
ProMED4\_15 1 -----MIEKKGDNIRSENFYDPSNYLLDQNTPEETLPEEQIFNTKKEFWPNSYWFIAERVNGRMAIGFIAAGVAVTTGQIIPGVF----- 84  
ProSS120\_01 1 -----MNNYWTIAERVNGRMAIGFIALGAVLTTGQIIPGVF----- 39  
SynWH8102\_07 1 -----VFAAMTRPAFOYEQPERFGEISLTTARPWKKSALTEVERLNGRAAMVGFSAVLCGLITGQIIPGVF----- 77

Clustal Consen 1

AE--NGR-AMIGF TGQIIPGIF
