# Supplementary material
Source: PubMed Central journal article supplement (PMC503735)

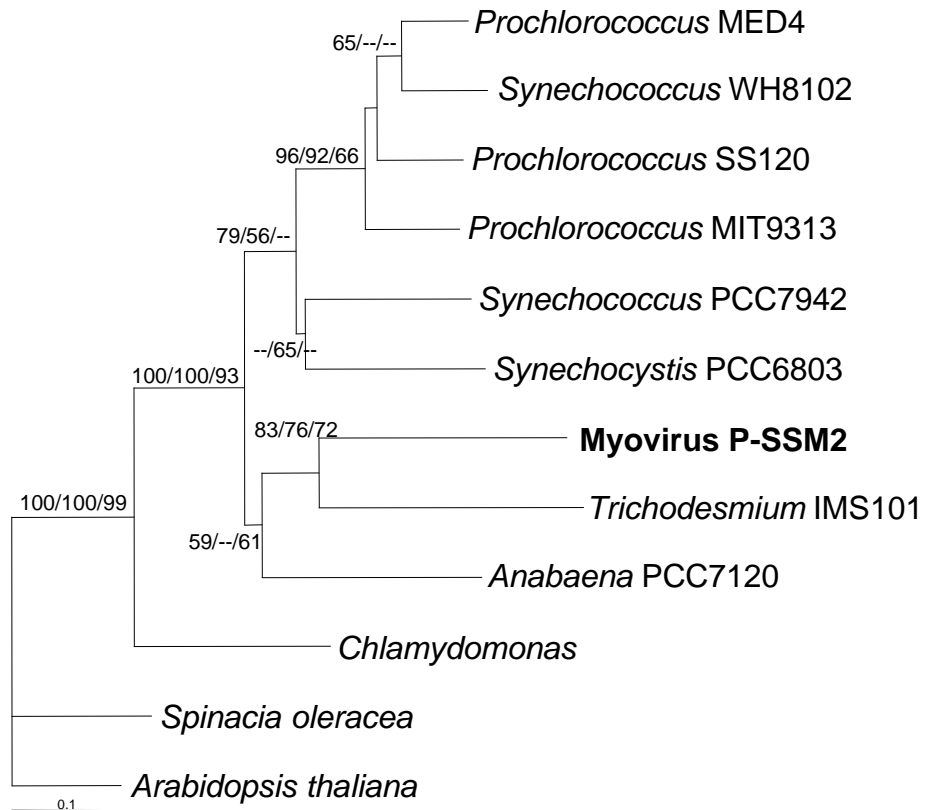

Supplement: pnas_101_30_11013__6.pdf [file pnas_101_30_11013__6.pdf]

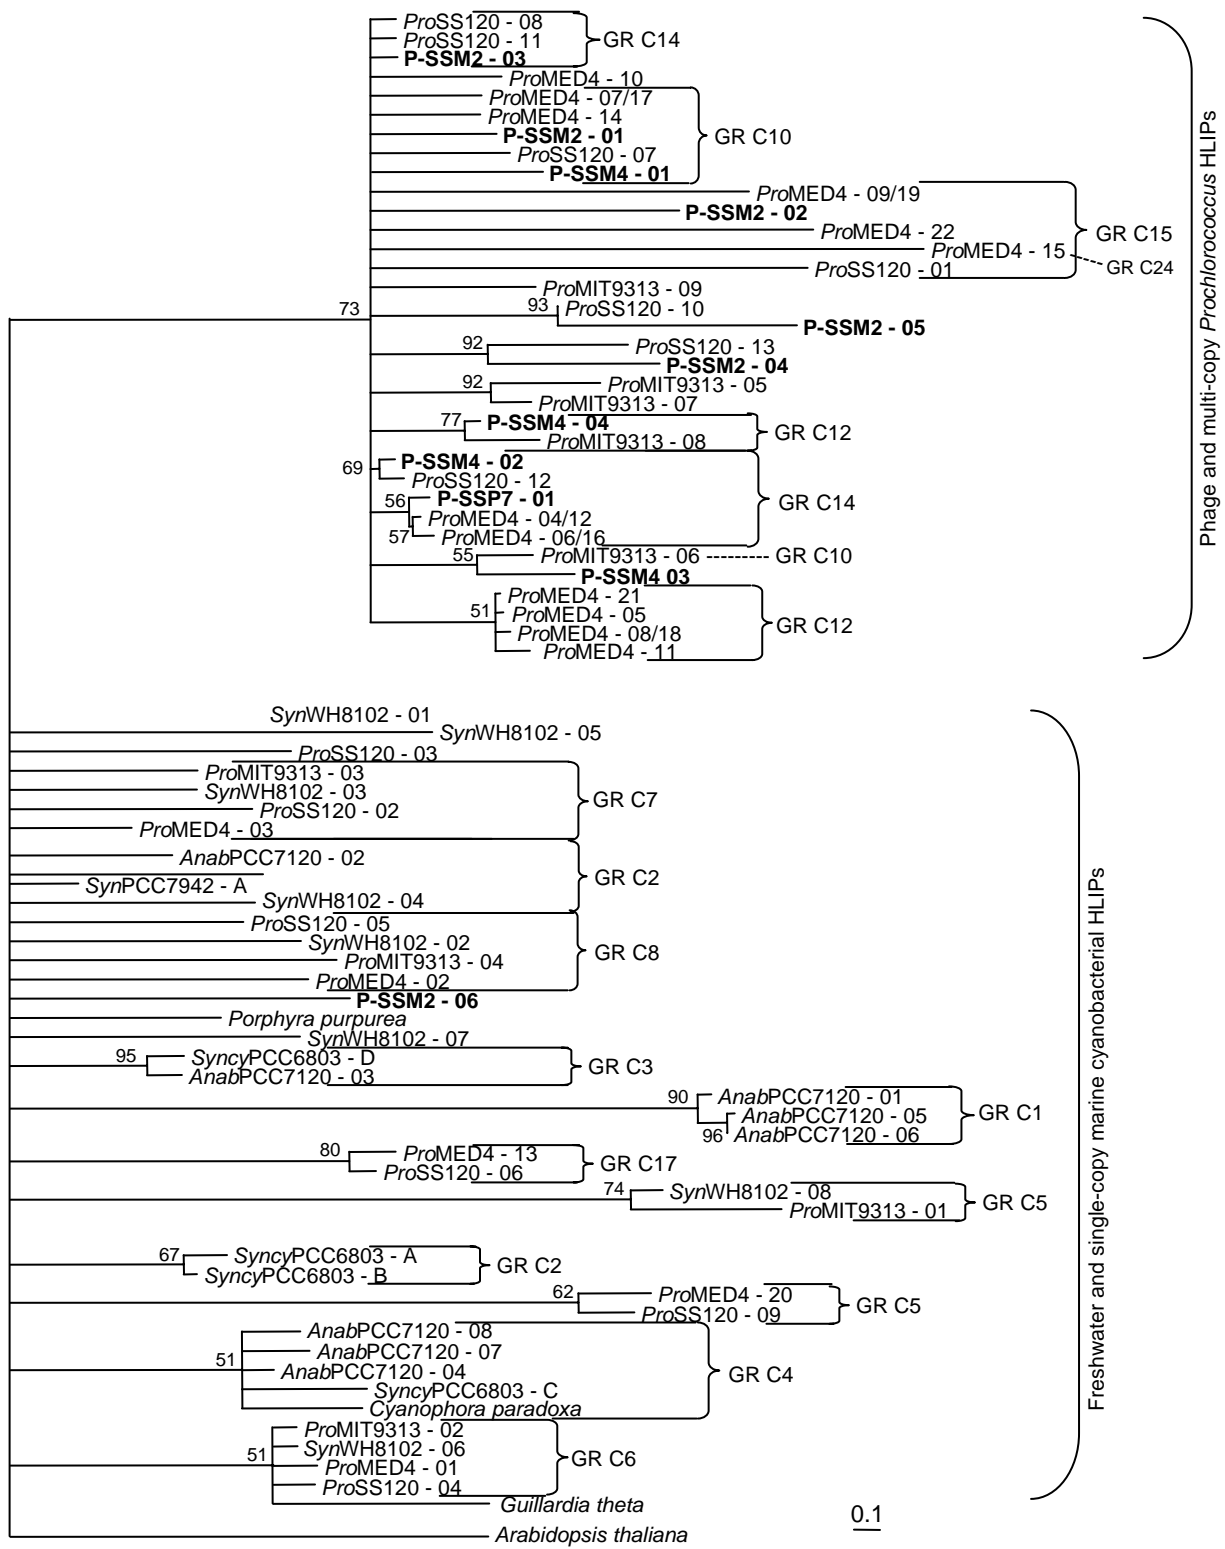

Supplement: pnas_101_30_11013__7.pdf [file pnas_101_30_11013__7.pdf]

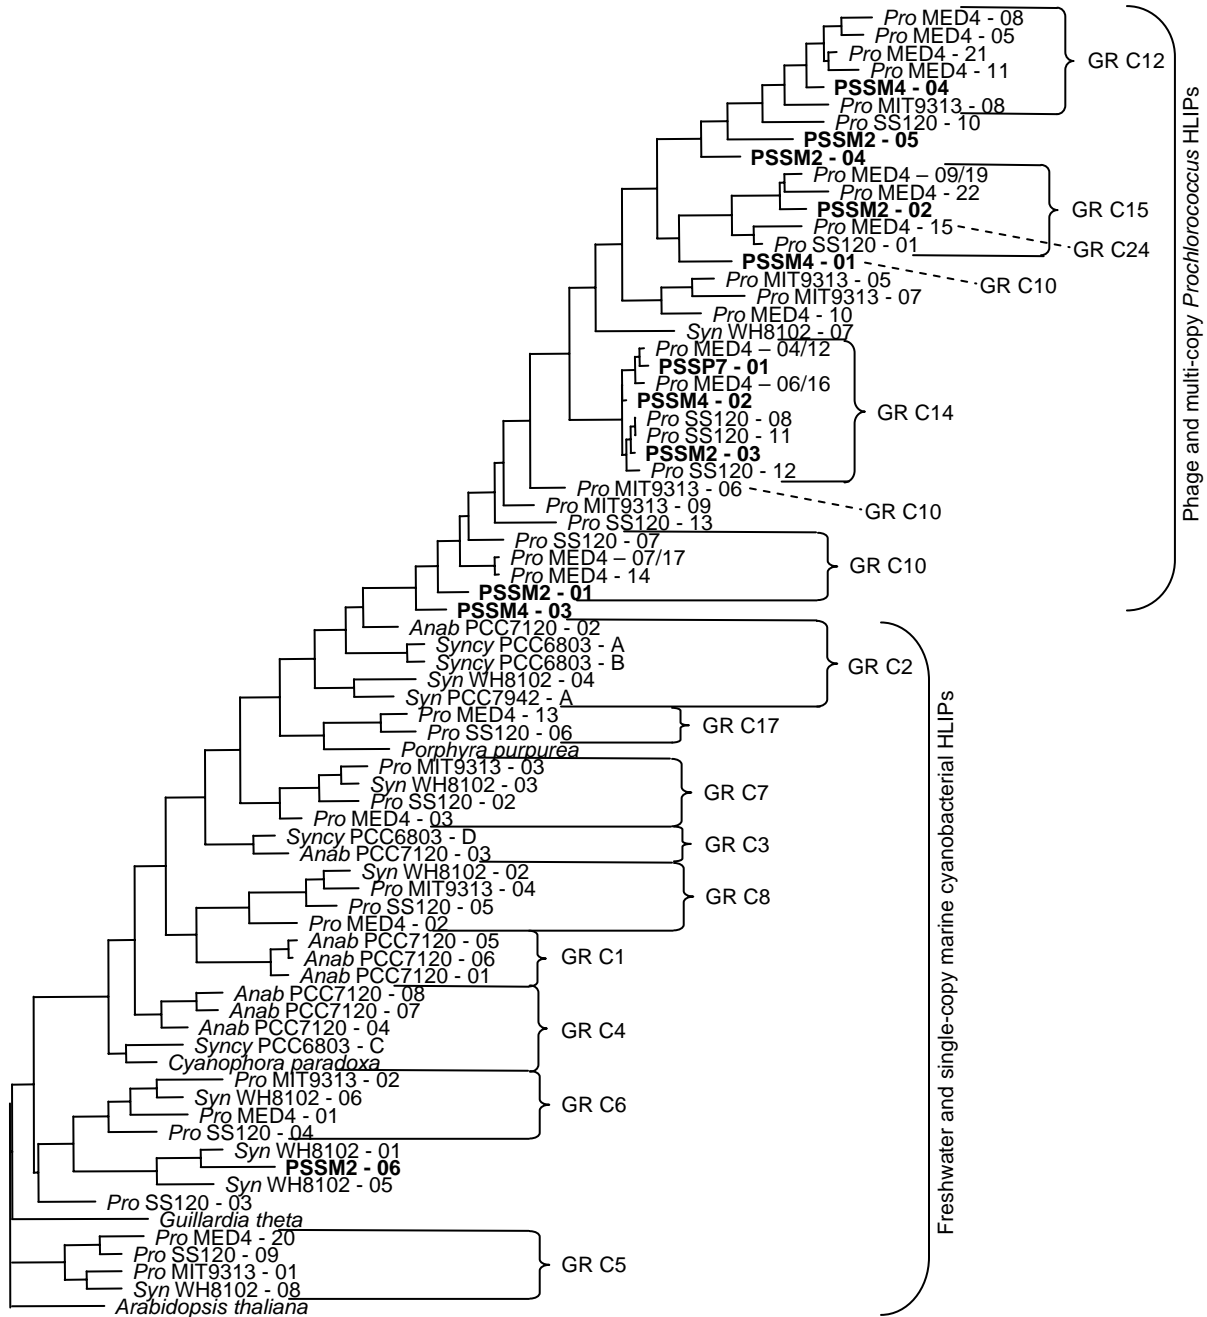

Supplement: pnas_101_30_11013__8.pdf [file pnas_101_30_11013__8.pdf]
